# Supplementary material
Source: PubMed Central journal article supplement (PMC524696)
Supplement: pnas_101_45_15955__2.pdf [file pnas_101_45_15955__2.pdf]

**Table 1. List of genes whose expression patterns have been shown to be hair-growth-cycle-dependent (by using quantitative methods (e.g., RT-PCR and RNase-protection assay) or found to be expressed in the hair follicle by using semi-quantitative methods (e.g., *in situ* hybridization and immunohistochemistry)**

| Probe ID    | Gene Name                            | Symbol    | P-value | Cluster | P1     | P6      | P14     | P17     | P23     | 9 Wk    | 5 Mo    | 1 Yr    |
|-------------|--------------------------------------|-----------|---------|---------|--------|---------|---------|---------|---------|---------|---------|---------|
| 101374_at   | keratin associated protein 6-1       | Krtap6-1  | 0.0000  | 6       | 297.4  | 19867.0 | 29604.4 | 19569.2 | 120.7   | 655.1   | 357.9   | 2333.2  |
| 99569_at    | keratin complex 2, basic, gene       | Krt2-18   | 0.0000  | 6       | 905.4  | 7014.5  | 10928.7 | 7575.6  | 89.8    | 122.3   | 284.6   | 1281.0  |
| 93555_at    | keratin complex 2, basic, gene       | Krt2-10   | 0.0000  | 6       | 46.2   | 12016.5 | 17919.5 | 11254.2 | 39.0    | 211.4   | 180.3   | 2031.0  |
| 97152_at    | keratin associated protein 8-2       | Krtap8-2  | 0.0000  | 6       | 5.9    | 5791.9  | 7305.4  | 2712.7  | 5.8     | 54.3    | 32.2    | 632.5   |
| 94227_at    | keratin associated protein 9-1       | Krtap9-1  | 0.0000  | 6       | 58.7   | 17737.2 | 53596.8 | 28848.4 | 38.3    | 331.3   | 355.6   | 4280.4  |
| 101569_at   | keratin complex 2, basic, gene       | Krt2-6g   | 0.0000  | 6       | 3134.6 | 30820.9 | 43346.2 | 26145.5 | 238.6   | 401.8   | 731.4   | 6186.6  |
| 102793_at   | keratin associated protein 8-1       | Krtap8-1  | 0.0000  | 6       | 564.1  | 23897.3 | 36955.3 | 19460.1 | 112.9   | 403.9   | 550.3   | 5624.5  |
| 93800_f_at  | keratin complex-1, acidic, gene      | Krt1-c29  | 0.0000  | 6       | 2157.3 | 20061.1 | 32469.4 | 21097.3 | 209.9   | 517.7   | 548.5   | 3439.7  |
| 92246_at    | keratin associated protein 14        | Krtap14   | 0.0000  | 6       | 141.6  | 15462.5 | 34366.4 | 15317.9 | 115.8   | 391.9   | 538.0   | 3097.5  |
| 97469_at    | keratin associated protein 3-3       | Krtap3-3  | 0.0000  | 6       | 676.6  | 11543.4 | 23295.8 | 14962.6 | 292.4   | 392.6   | 352.6   | 3650.3  |
| 101052_g_at | S100 calcium binding protein A3      | S100a3    | 0.0000  | 6       | 808.3  | 10379.5 | 18514.3 | 11772.2 | 24.1    | 115.6   | 201.9   | 1568.8  |
| 97814_at    | keratin complex 1, acidic, gene 3    | Krt1-3    | 0.0000  | 6       | 661.5  | 22730.3 | 34201.3 | 18494.7 | 284.2   | 1236.5  | 849.7   | 6328.2  |
| 103558_at   | keratin complex 1, acidic, gene 1    | Krt1-1    | 0.0000  | 6       | 410.3  | 18273.5 | 31986.3 | 13333.2 | 110.4   | 478.5   | 412.1   | 3710.4  |
| 97470_at    | keratin associated protein 3-1       | Krtap3-1  | 0.0000  | 6       | 1009.9 | 35232.0 | 54899.7 | 31737.7 | 290.3   | 967.4   | 858.6   | 12150.6 |
| 98423_at    | gap junction membrane channel        | Gjb2      | 0.0000  | 6       | 2949.8 | 15338.3 | 22366.4 | 10062.4 | 273.5   | 523.1   | 449.0   | 5181.9  |
| 160274_at   | keratin complex 1, acidic, gene 4    | Krt1-4    | 0.0000  | 6       | 278.4  | 11461.1 | 23738.4 | 14313.4 | 50.8    | 387.4   | 195.4   | 2345.7  |
| 92215_at    | keratin associated protein 12-1      | Krtap12-1 | 0.0000  | 5       | 19.6   | 892.2   | 2703.6  | 1865.7  | 8.0     | 34.5    | 32.7    | 351.1   |
| 160937_at   | crystallin, mu                       | Crym      | 0.0000  | 6       | 57.7   | 2591.9  | 6561.1  | 4125.4  | 9.9     | 50.6    | 36.9    | 406.2   |
| 92253_at    | keratin associated protein 6-2       | Krtap6-2  | 0.0000  | 6       | 123.6  | 19794.6 | 24568.8 | 18519.2 | 86.9    | 457.9   | 318.7   | 2531.3  |
| 102956_at   | homeo box, msh-like 2                | Msx2      | 0.0000  | 6       | 402.6  | 1737.7  | 1843.0  | 1355.4  | 16.6    | 33.7    | 67.1    | 297.7   |
| 103803_at   | peptidyl arginine deiminase, type    | Padi3     | 0.0000  | 6       | 272.1  | 2603.4  | 4357.0  | 2976.1  | 23.9    | 125.0   | 74.1    | 565.6   |
| 99328_at    | distal-less homeobox 3               | Dlx3      | 0.0000  | 5       | 1630.8 | 4416.7  | 5094.2  | 3785.3  | 374.3   | 525.3   | 533.9   | 1326.5  |
| 96782_at    | keratin complex 2, basic, gene       | Krt2-19   | 0.0000  | 6       | 1165.9 | 24470.5 | 40081.8 | 22857.2 | 702.0   | 1395.4  | 2146.1  | 9152.1  |
| 97767_at    | keratin complex 1, acidic, gene 2    | Krt1-2    | 0.0000  | 6       | 1276.0 | 9889.2  | 16269.7 | 8797.3  | 851.7   | 2030.6  | 1066.2  | 5223.6  |
| 104369_at   | keratin complex 2, basic, gene       | Krt2-6a   | 0.0000  | 29      | 2218.2 | 7584.6  | 16327.7 | 13801.3 | 7331.9  | 10971.2 | 6973.9  | 4966.8  |
| 93710_at    | keratin associated protein 5-1       | Krtap5-1  | 0.0000  | 5       | 1510.4 | 13453.0 | 28182.9 | 15357.1 | 1169.8  | 2909.3  | 2082.6  | 7182.0  |
| 98998_r_at  | keratin complex 1, acidic, gene      | Krt1-24   | 0.0000  | 5       | 767.1  | 7247.0  | 8968.4  | 4056.1  | 180.0   | 529.9   | 464.8   | 1906.1  |
| 92332_at    | distal-less homeobox 2               | Dlx2      | 0.0000  | 5       | 296.1  | 602.3   | 578.6   | 320.8   | 62.4    | 64.2    | 44.9    | 129.5   |
| 92862_f_at  | keratin complex 1, acidic, gene      | Krt1-17   | 0.0000  | 5       | 4102.7 | 12039.3 | 18743.1 | 11060.4 | 3408.6  | 5251.6  | 4715.1  | 7692.0  |
| 100735_at   | keratin associated protein 6-3       | Krtap6-3  | 0.0000  | 7       | 16.9   | 1315.8  | 425.2   | 2909.0  | 17.1    | 57.1    | 61.3    | 200.9   |
| 160586_r_at | trichohyalin                         | Thh       | 0.0000  | 5       | 318.4  | 598.7   | 1279.9  | 1596.2  | 29.3    | 37.1    | 48.0    | 208.4   |
| 160780_at   | transcription factor 3               | Tcf3      | 0.0000  | 24      | 1256.5 | 833.2   | 631.7   | 1029.5  | 859.1   | 549.8   | 806.5   | 608.0   |
| 92240_at    | keratin associated protein 5-4       | Krtap5-4  | 0.0000  | 5       | 100.2  | 1910.8  | 5873.9  | 3993.4  | 93.3    | 221.7   | 223.5   | 851.3   |
| 101526_at   | homeo box, msh-like 1                | Msx1      | 0.0000  | 4       | 400.2  | 698.0   | 537.2   | 622.2   | 237.7   | 291.8   | 250.5   | 233.2   |
| 103628_at   | lymphoid enhancer binding factor     | Lef1      | 0.0000  | 2       | 1676.8 | 2436.8  | 1971.9  | 1478.7  | 738.2   | 673.8   | 817.4   | 956.0   |
| 99051_at    | S100 calcium binding protein A4      | S100a4    | 0.0000  | 17      | 649.6  | 610.1   | 540.4   | 723.7   | 1913.1  | 1645.8  | 2863.6  | 1440.0  |
| 100409_at   | cadherin 3                           | Cdh3      | 0.0001  | 2       | 1725.4 | 1757.6  | 1527.2  | 1525.0  | 754.3   | 790.9   | 708.8   | 963.3   |
| 92369_at    | transforming growth factor alpha     | Tgfa      | 0.0001  | 7       | 115.5  | 248.0   | 374.9   | 631.7   | 159.5   | 161.7   | 185.9   | 251.2   |
| 94316_at    | keratin complex 2, basic, gene 5     | Krt2-5    | 0.0002  | 15      | 1834.3 | 563.5   | 797.9   | 736.7   | 527.7   | 517.4   | 522.0   | 243.1   |
| 98073_at    | cut-like 1 (Drosophila)              | Cutl1     | 0.0002  | 5       | 1474.9 | 2649.7  | 3392.1  | 2673.6  | 905.7   | 1076.1  | 1153.5  | 1756.6  |
| 103589_at   | keratin complex 1, acidic, gene      | Krt1-16   | 0.0003  | 7       | 776.0  | 213.7   | 753.3   | 1027.5  | 89.8    | 117.0   | 124.8   | 236.0   |
| 92674_at    | forkhead box N1                      | Foxn1     | 0.0003  | 5       | 103.6  | 605.1   | 793.8   | 758.3   | 54.3    | 101.7   | 76.1    | 169.9   |
| 92770_at    | S100 calcium binding protein A6      | S100a6    | 0.0003  | 7       | 6662.9 | 14519.1 | 22113.1 | 15912.8 | 10222.7 | 10566.9 | 14363.6 | 13559.9 |
| 96503_at    | keratin complex 2, basic, gene       | Krt2-16   | 0.0004  | 7       | 41.3   | 329.1   | 1469.7  | 1228.1  | 21.9    | 31.3    | 40.3    | 188.8   |
| 160430_at   | catenin beta                         | Catnb     | 0.0004  | 8       | 6080.5 | 6909.4  | 7960.6  | 7010.3  | 4996.0  | 3339.8  | 4813.4  | 4333.5  |
| 99390_at    | wingless-related MMTV                | Wnt5a     | 0.0006  | 2       | 238.5  | 409.4   | 338.7   | 232.4   | 104.3   | 39.6    | 75.6    | 58.3    |
| 102299_at   | protein kinase C, alpha              | Prkca     | 0.0007  | 8       | 47.5   | 178.3   | 375.8   | 507.0   | 149.8   | 106.7   | 142.8   | 169.2   |
| 95286_at    | clusterin                            | Clu       | 0.0009  | 7       | 876.5  | 1777.9  | 4949.4  | 3585.1  | 844.9   | 1148.4  | 1100.3  | 1781.3  |
| 101963_at   | cathepsin L                          | Ctsl      | 0.0009  | 7       | 1957.8 | 4036.2  | 7792.6  | 6889.2  | 2804.1  | 3081.0  | 3278.5  | 3498.7  |
| 104262_at   | parathyroid hormone-like peptide     | Pthlh     | 0.0019  | 8       | 376.9  | 418.6   | 798.8   | 475.3   | 307.2   | 187.0   | 284.6   | 306.6   |
| 99964_at    | vitamin D receptor                   | Vdr       | 0.0019  | 7       | 218.0  | 509.3   | 620.6   | 713.7   | 296.8   | 307.9   | 402.1   | 381.8   |
| 97497_at    | Notch gene homolog 1                 | Notch1    | 0.0019  | 9       | 1037.9 | 2868.7  | 2612.6  | 1637.8  | 1114.4  | 1472.9  | 1367.7  | 1911.8  |
| 99956_at    | kit oncogene                         | Kit       | 0.0021  | 3       | 490.4  | 406.2   | 303.9   | 337.9   | 280.3   | 142.6   | 168.4   | 117.5   |
| 100924_at   | GATA binding protein 3               | Gata3     | 0.0050  | 29      | 1261.0 | 2040.8  | 2133.0  | 2484.3  | 1977.8  | 1965.3  | 2506.4  | 2493.1  |
| 102559_at   | bone morphogenetic protein 2         | Bmp2      | 0.0106  | 7       | 179.7  | 189.0   | 350.7   | 322.7   | 130.5   | 173.7   | 145.7   | 89.7    |
| 160469_at   | thrombospondin 1                     | Thbs1     | 0.0113  | 15      | 508.1  | 308.2   | 417.6   | 1487.1  | 480.2   | 159.9   | 639.8   | 234.1   |
| 101842_g_at | epidermal growth factor receptor     | Egfr      | 0.0122  | 7       | 435.5  | 691.1   | 1007.1  | 889.2   | 486.0   | 631.9   | 480.3   | 559.7   |
| 94755_at    | interleukin 1 alpha                  | Il1a      | 0.0148  | 15      | 218.0  | 213.2   | 193.0   | 239.2   | 208.9   | 177.9   | 226.9   | 132.2   |
| 95030_at    | prolactin receptor                   | Prlr      | 0.0180  | 21      | 358.7  | 313.2   | 222.2   | 449.3   | 560.0   | 610.1   | 543.0   | 328.5   |
| 101161_at   | melanocortin 1 receptor              | Mc1r      | 0.0200  | 2       | 333.2  | 416.2   | 282.3   | 298.4   | 134.6   | 112.3   | 155.7   | 148.1   |
| 92925_at    | CCAAT/enhancer binding protein       | Cebpb     | 0.0221  | 9       | 2400.5 | 3844.4  | 4078.3  | 3279.6  | 3008.5  | 4022.8  | 2635.0  | 3771.0  |
| 98067_at    | cyclin-dependent kinase inhibitor    | Cdkn1a    | 0.0229  | 7       | 1387.1 | 2017.3  | 3022.4  | 2591.8  | 1160.3  | 1145.1  | 900.7   | 1251.7  |
| 93914_at    | interleukin 1 receptor, type I       | Il1r1     | 0.0230  | 27      | 296.0  | 310.0   | 384.2   | 401.3   | 456.6   | 449.4   | 488.4   | 350.0   |
| 95758_at    | stearyl-Coenzyme A desaturase        | Scd2      | 0.0248  | 10      | 3436.8 | 4378.1  | 4942.3  | 3110.9  | 3056.8  | 2208.7  | 2399.2  | 2566.9  |
| 102666_at   | tyrosinase                           | Tyr       | 0.0262  | 4       | 126.5  | 196.5   | 177.7   | 92.6    | 55.8    | 56.8    | 48.7    | 50.6    |
| 94097_at    | GLI-Kruppel family member GLI        | Gli       | 0.0264  | 1       | 1044.7 | 545.5   | 319.7   | 163.2   | 250.6   | 96.5    | 124.3   | 193.4   |
| 161010_r_at | cyclin-dependent kinase inhibitor    | Cdkn1b    | 0.0264  | 20      | 55.0   | 67.4    | 40.0    | 52.2    | 61.0    | 20.8    | 50.2    | 42.8    |
| 98140_at    | cadherin 1                           | Cdh1      | 0.0277  | 15      | 819.0  | 706.4   | 853.4   | 765.4   | 637.4   | 596.4   | 568.5   | 403.9   |
| 98482_at    | parathyroid hormone receptor 1       | Pthrr1    | 0.0284  | 23      | 539.5  | 353.2   | 87.5    | 166.5   | 404.2   | 156.4   | 203.2   | 106.8   |
| 95546_g_at  | insulin-like growth factor 1         | Igf1      | 0.0377  | 16      | 372.6  | 130.5   | 59.5    | 195.8   | 431.5   | 281.7   | 567.9   | 222.9   |
| 160519_at   | tissue inhibitor of                  | Timp3     | 0.0377  | 27      | 1675.0 | 1878.1  | 2390.0  | 3246.4  | 3802.8  | 3100.0  | 3369.8  | 2545.0  |
| 98447_at    | CCAAT/enhancer binding protein       | Cebpa     | 0.0482  | 30      | 7778.7 | 7668.6  | 5378.1  | 6443.0  | 8189.5  | 8730.2  | 6996.8  | 8401.6  |
| 93872_at    | glial cell line derived neurotrophic | Gfra1     | 0.0526  | -       | 103.0  | 35.6    | 62.3    | 92.5    | 100.7   | 43.4    | 84.3    | 23.7    |
| 94056_at    | stearyl-Coenzyme A desaturase        | Scd1      | 0.0535  | -       | 5611.4 | 8669.5  | 12344.9 | 13892.8 | 17651.0 | 24149.1 | 16868.7 | 21269.7 |
| 102658_at   | interleukin 1 receptor, type II      | Il1r2     | 0.0710  | -       | 304.3  | 386.7   | 395.0   | 667.5   | 1217.6  | 1748.2  | 1193.2  | 1246.6  |
| 99325_at    | wingless-related MMTV                | Wnt3      | 0.0928  | -       | 403.7  | 599.4   | 626.0   | 560.8   | 405.7   | 355.3   | 543.8   | 576.8   |
| 99577_at    | kit ligand                           | Kitl      | 0.0965  | -       | 644.6  | 474.5   | 446.3   | 305.8   | 626.3   | 288.9   | 510.2   | 303.1   |
| 96343_at    | calpain 12                           | Capn12    | 0.1076  | -       | 2190.2 | 1814.0  | 1868.4  | 2385.9  | 2011.5  | 964.1   | 1796.9  | 1019.8  |
| 93455_s_at  | bone morphogenetic protein 4         | Bmp4      | 0.1202  | -       | 672.7  | 624.5   | 592.2   | 930.4   | 514.1   | 458.9   | 425.6   | 510.2   |
| 92235_g_at  | retinoid X receptor alpha            | Rxra      | 0.1280  | -       | 800.6  |         |         |         |         |         |         |         |
