# Supplementary material
Source: PubMed Central journal article supplement (PMC524696)
Supplement: pnas_101_45_15955__7.pdf [file pnas_101_45_15955__7.pdf]

**Table 3. Microarray data on the genes validated by quantitative real-time PCR**

| Probe ID                | Gene Name                                 | Symbol | P1     | P6     | P14    | P17    | P23    | 9 Wk   | 5 Mo   | 1 Yr   |
|-------------------------|-------------------------------------------|--------|--------|--------|--------|--------|--------|--------|--------|--------|
| <i>Hair growth</i>      |                                           |        |        |        |        |        |        |        |        |        |
| 160647_at               | carbonic anhydrase 6                      | Car6   | 50.8   | 428.9  | 2777.2 | 2211.6 | 72.9   | 107.4  | 167.5  | 451.1  |
| 93122_at                | cysteine-rich secretory protein 1         | Crisp1 | 7.3    | 477.8  | 3152.2 | 1761.4 | 4.5    | 22.6   | 30.5   | 160.9  |
| 103283_at               | E74-like factor 5                         | Elf5   | 55.1   | 186.4  | 388.8  | 325.7  | 36.2   | 54.7   | 35.6   | 53.8   |
| 102363_r_at             | Jun-B oncogene                            | Junb   | 650.4  | 689.6  | 1182.1 | 1451.9 | 484.1  | 435.5  | 536.8  | 547.4  |
| 103048_at               | neuroblastoma myc-related oncogene 1      | Nmyc1  | 275.27 | 544.88 | 512.85 | 152.3  | 57.297 | 34.616 | 91.318 | 118.82 |
| 103490_at               | wingless-related MMTV integration site 11 | Wnt11  | 113.8  | 455.6  | 376.6  | 365.5  | 21.3   | 43.1   | 49.1   | 180.8  |
| <i>Anti-hair growth</i> |                                           |        |        |        |        |        |        |        |        |        |
| 98045_s_at              | disabled homolog 2 (Drosophila)           | Dab2   | 1697.3 | 366.5  | 239.5  | 443.4  | 1152.4 | 586.3  | 1508.3 | 353.7  |
| 161628_r_at             | fibulin 1                                 | Fbln1  | 1924.3 | 810.7  | 185.7  | 256.6  | 677.0  | 1200.0 | 404.0  | 1371.4 |
| 160939_at               | twist homolog 2 (Drosophila)              | Twist2 | 2887.5 | 1326.5 | 272.9  | 753.8  | 1358.9 | 343.9  | 871.3  | 287.2  |
