# Supplementary material
Source: PubMed Central journal article supplement (PMC524696)

**A**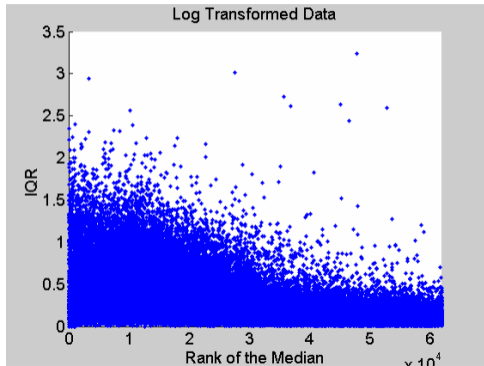**B**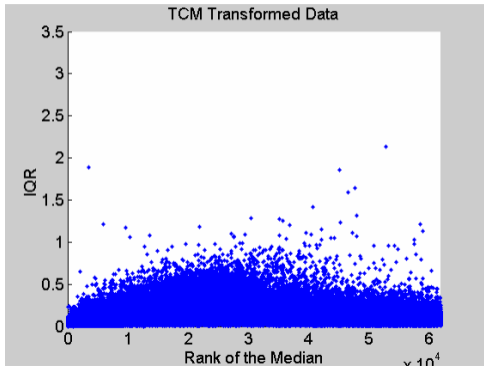

Supplement: pnas_101_45_15955__1.pdf [file pnas_101_45_15955__1.pdf]

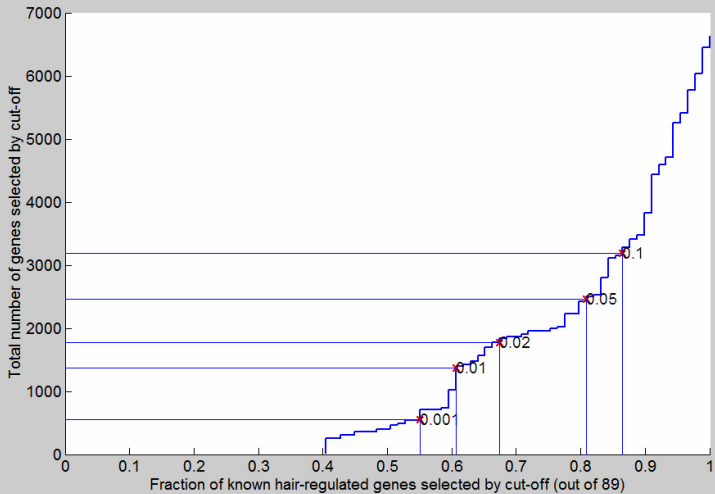

Supplement: pnas_101_45_15955__3.pdf [file pnas_101_45_15955__3.pdf]

**A**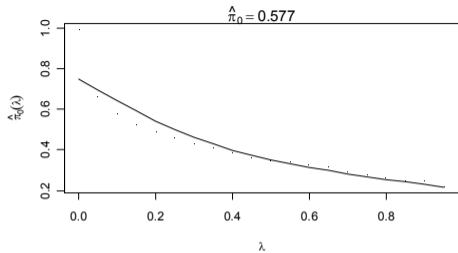**B**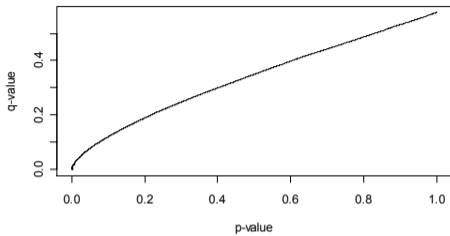**C**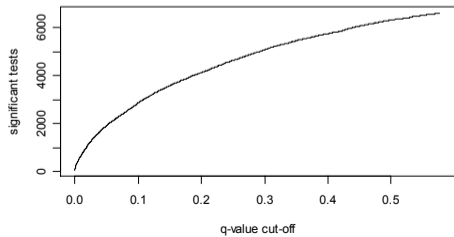**D**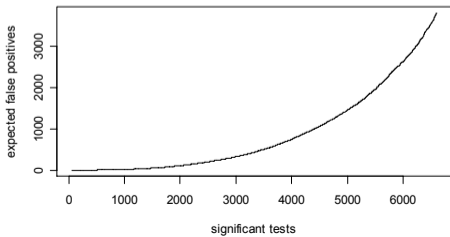

Supplement: pnas_101_45_15955__4.pdf [file pnas_101_45_15955__4.pdf]

**A**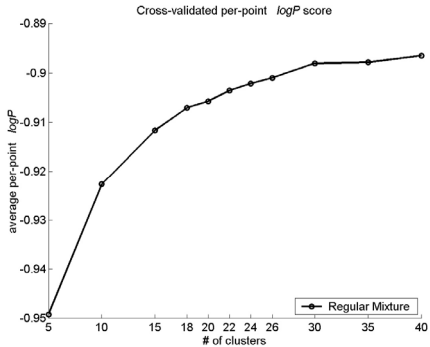**B**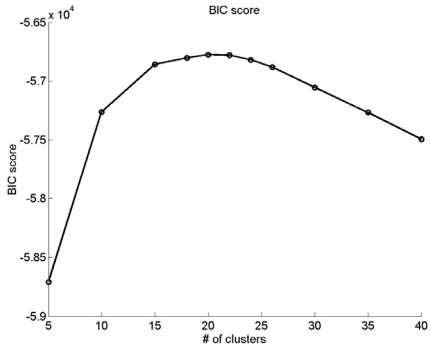

Supplement: pnas_101_45_15955__5.pdf [file pnas_101_45_15955__5.pdf]

Normalized mean expression

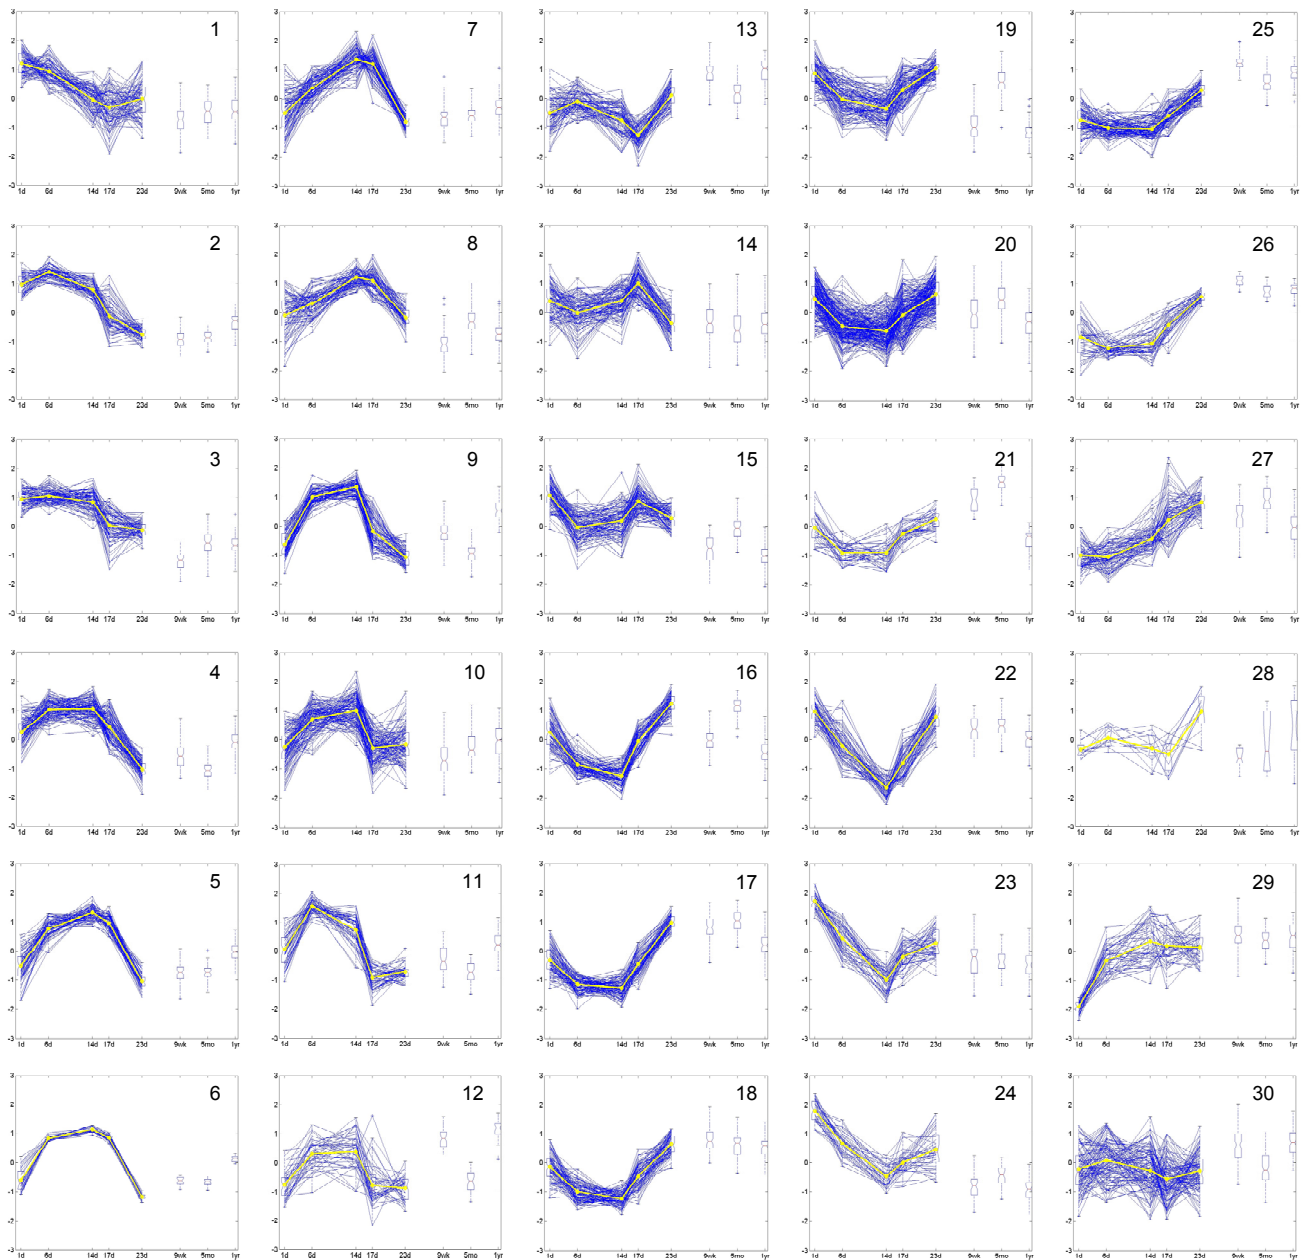

Time after birth

Supplement: pnas_101_45_15955__6.pdf [file pnas_101_45_15955__6.pdf]
